# Supplementary material for: Association between frailty and mortality among patients with accidental hypothermia: a nationwide observational study in Japan
Source: Springer Nature journal article supplement (doi:10.1186/s12877-021-02459-5), 2021-09-25
Supplement: MOESM1 [file 19716102]

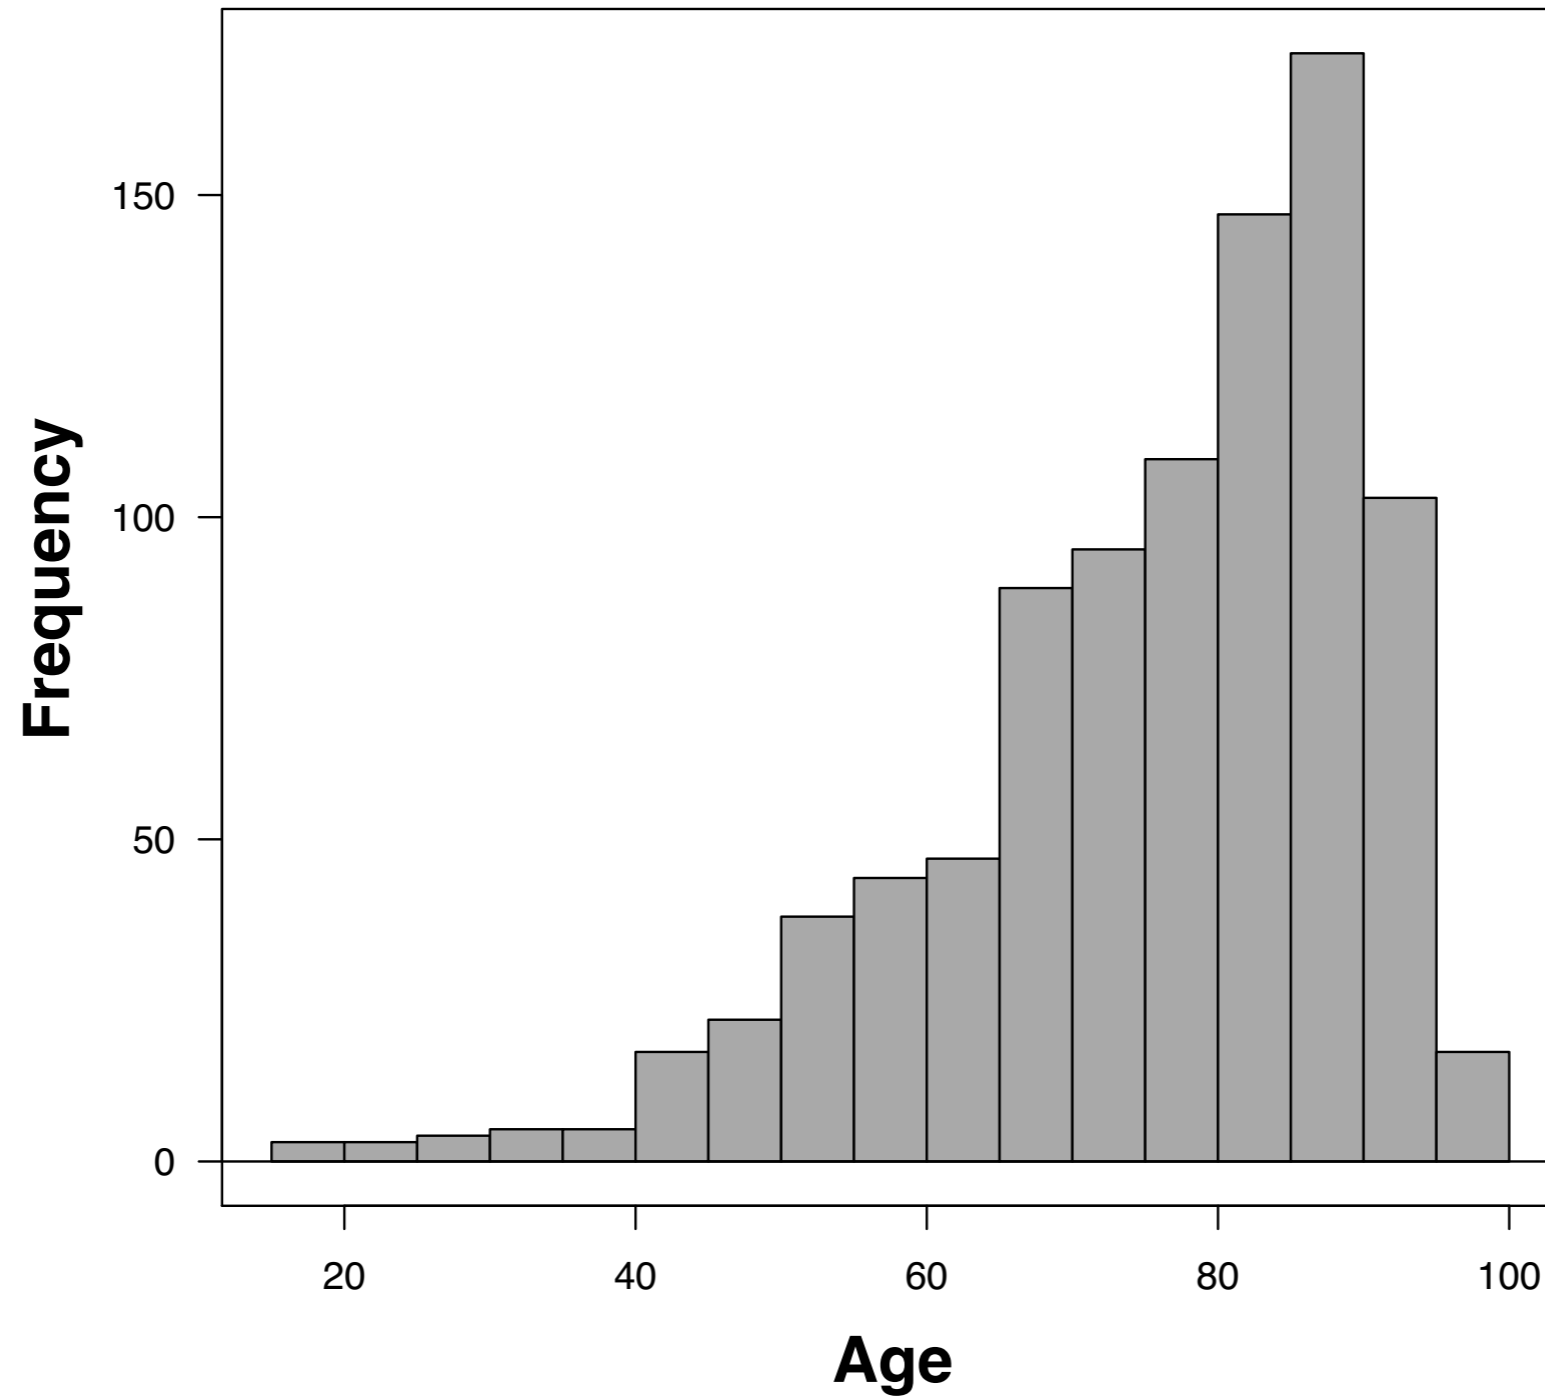

**Supplemental Figure 1.** The age distribution of patients with accidental hypothermia

Of the 920 patients, 746 (81%) were  $\geq 65$  years old.
